# Supplementary material for: Electronic, redox, and optical property prediction of organic π-conjugated molecules through a hierarchy of machine learning approaches
Source: Royal Society of Chemistry journal article supplement (doi:10.1039/d2sc04676h), 2022-11-17
Supplement: d2sc04676h2.csv [file d2sc04676h2.csv]

Descriptors	Description	Type
ExactMolWt	Precise molecular weight	Float
FpDensityMorgan1	Morgan fingerprint, radius 1	Float
FpDensityMorgan2	Morgan fingerprint, radius 2	Float
FpDensityMorgan3	Morgan fingerprint, radius 3	Float
HeavyAtomMolWt	Weight calculated without any hydrogens	Float
MolWt	Molecular weight using ineteger values	Integer
NumRadicalElectrons	Radical electrons in a molecule	Integer
NumValenceElectrons	Total valence electrons for all atoms	Integer
CalcAUTOCORR2D#vector	Autocorrelation vector using the molecule's 2D graph; 192 elements	Vector of floats
CalcChi0n	Methodology found in https://doi.org/10.1002/9780470125793.ch9	Float
CalcChi0v	All fruther chi descriptors are calcualted by RDKit using the methodology referenced	Float
CalcChi1n		Float
CalcChi1v		Float
CalcChi2n		Float
CalcChi2v		Float
CalcChi3n		Float
CalcChi3v		Float
CalcChi4n		Float
CalcChi4v		Float
CalcCrippenDescriptors	RDKit's implementation of Wildman-Crippen logp and molar refractivity values; 2 elements	Pair of floats
CalcFractionCSP3	fraction of C atoms that are SP3 hybridized	Float
CalcHallKierAlpha	Like Chi descriptors, Alpha methodology found here https://doi.org/10.1002/9780470125793.ch9	Float
CalcKappa1	Like Chi descriptors, all Kappa methodology found here https://doi.org/10.1002/9780470125793.ch9	Float
CalcKappa2		Float
CalcKappa3		Float
CalcLabuteASA	Rdkit's implementation of Labute's Approximate Surface Area	Float
CalcNumAliphaticCarbocycles	Number of aliphatic rings which contain only carbon	Integer
CalcNumAliphaticHeterocycles	Aliphatic rings with more than 1 atom type	Integer
CalcNumAliphaticRings	Total number of aliphatic rings	Integer
CalcNumAmideBonds	Bonds to nitrogen	Integer
CalcNumAromaticCarbocycles	Aromatic rings with only carbon	Integer
CalcNumAromaticHeterocycles	Aromatic rings with more than 1 atom type	Integer
CalcNumAromaticRings	All aromatic rings	Integer
CalcNumAtomStereoCenters	RDKit's guess at total # of chiral centers	Integer
CalcNumBridgeheadAtoms	Number of atoms that are part of two or more rings	Integer
CalcNumHBA	Number of hydrogen bond acceptors	Integer
CalcNumHBD	Number of hydrogen bond donors	Integer
CalcNumHeteroatoms	Number of non-carbon atoms	Integer
CalcNumHeterocycles	Number of rings which contain non-carbon atoms	Integer
CalcNumLipinskiHBA	Lipinski H-bond acceptors for a molecule	Integer
CalcNumLipinskiHBD	Lipinski H-bond donors for a molecule	Integer
CalcNumRings	Number of all rings	Integer
CalcNumRotatableBonds	Number of bonds which can rotate	Integer
CalcNumSaturatedCarbocycles	Completely saturated carbon-only rings	Integer
CalcNumSaturatedHeterocycles	Completely saturated rings with non-carbon atoms	Integer
CalcNumSaturatedRings	All saturated rings	Integer
CalcNumUnspecifiedAtomStereoCenters	Number of stereocenters not given explicitly	Integer
CalcTPSA	Topological polar surface area (TPSA) for 2D molecule	Integer
MQNs_#list	molecular quantum numbers from https://doi.org/10.1002/cmdc.200900317; 42 elements	Vector of integers
PEOE_VSA_	MOE-type descriptors using partial charges and surface area contributions; 14 elements	Vector of floats
GetMorganFingerprintAsBitVect	Vector of Fingerprints, variable length. None to 4096	Vector of integers
num_single	Single bond count	Integer
num_double	Double bond count	Integer
num_triple	Trple bond count	Integer
aromatic_bonds	Aromatic bond count	Integer
num_fluorine	Number of fluorines	Integer
num_chlorine	Number of chlorines	Integer
num_bromine	Number of bromine atoms	Integer
num_nitro	Number of nitrogens	Integer
num_oxy	Number of oxygen atoms	Integer
num_sulfur	Number of Sulfur atoms	Integer
unique_colors	Unique canonical atom ranks	Integer
